# 1 Regulation of pupil size in natural vision across the human 2 lifespan

3 Rafael Lazar<sup>1, 2, 3</sup> [[0000-0001-7972-5634](#)], Josefine Degen<sup>1</sup>, [[0000-0003-0155-7532](#)], Ann-Sophie Fiechter<sup>1</sup>, [[0000-0003-2967-081X](#)], Aurora Monticelli<sup>1</sup> [[0009-0003-6330-9398](#)], & Manuel Spitschan<sup>4, 5, 6</sup>, [[0000-0002-8572-9268](#)]

5  
6 <sup>1</sup> Centre for Chronobiology, Psychiatric Hospital of the University of Basel, Switzerland

7 <sup>2</sup> Research Cluster Molecular and Cognitive Neurosciences, University of Basel, Switzerland

8 <sup>3</sup> Department of Biomedicine, University of Basel, Switzerland.

9 <sup>4</sup> Max Planck Institute for Biological Cybernetics, Translational Sensory & Circadian Neuroscience, Tübingen, Germany

10 <sup>5</sup> TUM School of Medicine & Health, Chronobiology & Health, Technical University of Munich, Munich, Germany

11 <sup>6</sup> TUM Institute for Advanced Study (TUM-IAS), Technical University of Munich, Garching, Germany

12 <sup>¶</sup> To whom correspondence should be addressed: Prof. Dr Manuel Spitschan, [manuel.spitschan@tum.de](mailto:manuel.spitschan@tum.de)

## 13 14 Authors' Contributions

15 The authors made the following contributions. Rafael Robert Lazar: Conceptualization, Data  
16 curation, Formal Analysis, Investigation, Methodology, Project administration, Supervision,  
17 Visualization, Validation, Writing –original draft, Writing – review & editing; Josefine  
18 Degen: Investigation; Ann-Sophie Fiechter: Investigation; Aurora Monticelli: Investigation;  
19 Manuel Spitschan: Conceptualization, Data curation, Funding acquisition, Methodology,  
20 Project administration, Resources, Supervision, Visualization, Validation, Writing – original  
21 draft, Writing – review & editing.

## 22 Abstract

23 Vision is mediated by light passing through the aperture of the eye, the pupil, which changes  
24 in diameter from ~2 to ~8 mm from the brightest to the darkest illumination. In addition, with  
25 age, mean pupil size declines. In laboratory experiments, factors affecting pupil size can be  
26 experimentally controlled or held constant, but how the pupil reflects changes in retinal input  
27 from the visual environment under natural viewing conditions is not clear. Here, we address  
28 this question in a field experiment ( $N=83$ , 43 female, age: 18-87 years) using a custom-made  
29 wearable video-based eye tracker with a spectroradiometer measuring spectral irradiance in  
30 the approximate corneal plane. Participants moved in and between indoor and outdoor  
31 environments varying in spectrum and engaged in a range of everyday tasks. Our real-world  
32 data confirm that light-adapted pupil size is determined by light intensity, with clear  
33 superiority of melanopic over photopic units, and that it decreases with increasing age,  
34 yielding steeper slopes at lower light levels. We find no indication that sex, iris colour or  
35 reported caffeine consumption affect pupil size. Taken together, the data provide strong  
36 evidence for considering age in personalised lighting solutions and for using melanopsin-  
37 weighted light measures to assess real-world lighting conditions.

## 38 **Acknowledgements**

39 During parts of this work, M.S. was supported by a Sir Henry Wellcome Trust Fellowship  
40 (Wellcome Trust 204686/Z/16/Z) and a Junior Research Fellowship from Linacre College,  
41 University of Oxford. R.L. is funded by the European Training Network LIGHTCAP (project  
42 number 860613) under the Marie Skłodowska-Curie actions framework H2020-MSCA-ITN-  
43 2019. This study was funded by an investigator-initiated research project supported by Ocean  
44 Insight. We thank Dimitri Hawrylenko, Majlinda Maliqi, and Sebastian Saraceno for their  
45 assistance in the data collection, Dr Johannes Zauner for his helpful comments on the  
46 analysis code, and the anonymous reviewers for their comments in the Stage 1 submission.

## 47 Introduction

48 Human vision depends on light impinging on the retina and exciting the retinal  
49 photoreceptors. Serving as the aperture of the visual system, the pupil is able to adjust the  
50 amount of incident light by constricting or dilating to diameters ranging from ~2 to ~8 mm  
51 under the brightest and darkest conditions, respectively [1, 2]. By this route, the pupil  
52 regulates retinal illuminance within a limited range (~16x, or 1.2 log units between smallest  
53 and largest pupil) [3]. The pupil is also critical in attaining optimal optical quality of the  
54 retinal image [4, 5] by balancing necessary retinal illuminance with optical aberrations [6, 7]  
55 and depth of focus [8]. Hence, pupil size is an essential determinant for visual performance  
56 under changing ambient illumination.

57 *Light-level dependence of pupil size.* It is well known that pupil size generally depends on  
58 light level. This effect is encoded by the joint action of the five retinal photoreceptor classes  
59 in the human retina: rods, three types of cones, and melanopsin, which is expressed in the  
60 intrinsically photosensitive retinal ganglion cells (*ipRGCs*). Each photoreceptor class is  
61 characterised by a distinct wavelength of maximal sensitivity, but due to their broad spectral  
62 tuning, the photoreceptors overlap greatly in their spectral sensitivities [9]. Rods have their  
63 peak sensitivity near 495 nm and characteristically show saturation under photopic or  
64 “daylight” light levels and are thus mainly responsible for scotopic or “night” vision. The  
65 three types of cones controlling photopic vision, namely the long-wavelength-sensitive L-  
66 cones, the medium-wavelength-sensitive M-cones and the short-wavelength-sensitive S-  
67 cones, peak near 558, 530, and 420 nm, respectively. Melanopsin exhibits its maximum  
68 spectral sensitivity near 480 nm. The *ipRGCs* expressing melanopsin differ markedly from  
69 the other photoreceptors in their temporal response to light, showing longer latency and  
70 sustained depolarization [10, 11]. While the *ipRGCs* are themselves photosensitive, they also  
71 receive synaptic inputs from the cones and rods [10]. All photoreceptors contribute to the  
72 control of the pupil, though their spatial distribution and temporal “niches” are different.  
73 Converging evidence suggests that in daylight light levels, the mean steady-state pupil size is  
74 mainly controlled by the melanopsin-encoded signal [11-16]. For dynamic pupil size  
75 responses, the melanopsin-encoded signal seems to have a smaller role in pupil size control  
76 with increasing temporal frequency [17, 18].

77 *Age-dependence of pupil size.* Pupil size is affected by age. Steady-state pupil size starts to  
78 decrease with age after the second decade of life, both in dark [19-21] and light adaptation  
79 [13, 22-28]. This age effect, also termed “senile miosis”, is more pronounced in dimmer light  
80 compared to more intense light conditions [13, 24, 28, 29]. For instance, given a luminance  
81 of 9 cd/m<sup>2</sup>, Winn et al. (1994) [28] reported an age related decrease of pupil size of ~0.043  
82 mm per year. This amounts to a ~1.72 mm difference comparing a typical 60-year-old and  
83 20-year old person at that light level. A variety of processes have been proposed as possible  
84 causes for the age-related functional decrease of the pupil [2] such as structural iris damage  
85 like stiffness and muscle degeneration [30, 31], sympathetic and parasympathetic deficits  
86 [23] as well as deficiency in central inhibition [21]. Notably, there are also various retinal  
87 degradation processes associated with ageing such as the decrease in photoreceptor density

88 [32] and delayed photopigment regeneration [33], along with ageing phenomena like lens  
89 yellowing [34] that could partly contribute to the functional shrinking of pupil size.

90 *Pupil size model.* Drawing from the extensive literature on stimuli affecting pupil size,  
91 Watson and Yellott (2012) [35] developed a unified formula for predicting pupil size from  
92 luminance, age, number of eyes and field diameter (see Fig. 1C for example predictions as a  
93 function of luminance and age). This formula summarises the luminance-dependence of the  
94 pupil from a total of eight extant studies [28, 36-42]. However, luminance reflects only a  
95 weighted combination of the L- and M-cones. As discussed previously, all photoreceptors  
96 participate in controlling pupil size and therefore, parametrizing retinal intensity as a function  
97 of luminance does not predict pupil size well [12, 15, 43].

98 *Pupil size in naturalistic conditions.* Our understanding of the factors influencing pupil size  
99 almost exclusively stems from controlled laboratory studies using simplified parametric  
100 stimuli and has generated an internally valid body of well-controlled studies. Yet, to predict  
101 pupil size in the real world, research needs to be extended to naturalistic environments [44-  
102 46]. As pupil size is a crucial factor for visual performance in real life, it is necessary to  
103 confirm how it varies in an age- and gender-balanced sample, performing ecologically  
104 relevant tasks in everyday-life settings under naturalistic illumination.

105 To our knowledge, a very limited number of studies have yet investigated pupil size under  
106 real-world conditions. A study by Koch et al. (1991) [25] simulated viewing conditions of  
107 five naturalistic tasks in an indoor laboratory setting (night-time driving, reading dim and  
108 bright illumination, distant viewing in direct and indirect sunlight) and confirmed the  
109 decrease of pupil size with increased illumination and higher age. Harley and Sliney (2018)  
110 [47] examined outdoor daylight-adapted pupil sizes of 87 subjects from a military population  
111 between 790 cd/m<sup>2</sup> and 4,250 cd/m<sup>2</sup>. Crucially, both studies parametrise the lighting  
112 conditions in terms of luminance (weighted sum of L- and M-cones). If a spectrum does not  
113 change with light level, then the change in (il)luminance as a function of light level will be  
114 proportional to the change in melanopic (ir)radiance. However, in the real world, the  
115 illuminant and reflectance spectra (and the resultant scene spectra) can be very diverse (the  
116 “spectral diet”, [48]), due to different sources of illumination (e.g. daylight, incandescent,  
117 fluorescent, LED lighting). As a consequence, (il)luminance and melanopic (ir)radiance are  
118 not always correlated (see Fig. 2 in [15] for this dissociation under real-world spectra).

119 Here, we perform a confirmatory analysis of age effects and effects of spectrally weighted  
120 illumination on the light-adapted pupil size during real-life indoor and outdoor light and  
121 viewing-task conditions in a healthy, age-diverse sample. Our confirmatory hypotheses (CH)  
122 are:

- 123 • CH1: **In real-world conditions, light-adapted pupil size changes as a function of**  
124 **melanopsin sensitivity-weighted retinal illumination, with higher illumination**  
125 **associated with a smaller pupil size.**
- 126 • CH2: **In real-world conditions, melanopsin sensitivity-weighted retinal**  
127 **illumination better predicts pupil size than the weighted sum of L- and M-cone-**  
128 **weighted retinal illumination (CIE 1931 Y, photopic illuminance).**



- 129       • **CH3: In real-world conditions, light-adapted pupil size changes as a function of**  
130       **age, with higher age associated with a smaller pupil size.**

131 We tested each of these hypotheses using a linear mixed model (LMM) and calculated the  
132 total evidence for each of the hypotheses using the Bayes Factor (BF) comparing the full  
133 model formulated for each hypothesis with the appropriate null model (see *Analytic Strategy*  
134 below).

135

## 136 **Materials and Methods**

137 **Participant characteristics.** We aimed to recruit a total of 96 healthy volunteers (48 female,  
138 48 male) from the community. To achieve a balanced and age-diverse sample, we sought to  
139 recruit 16 volunteers in each of the following age groups<sup>1</sup>: 18-24 years, 25-34 years, 35-44  
140 years, 45-54 years, 55-65 years, and >65 years of age. Only participants wearing contact  
141 lenses or requiring no vision correction were included as our measurement device is not  
142 compatible with wearing glasses. All participants must have 20/40 visual acuity or better  
143 (assessed by Snellen chart) and normal colour vision (assessed by HRR test). Additionally,  
144 participants were screened for relevant medication, disorders (neurological, metabolic), eye  
145 conditions, mental health (assessed by the German version of the GHQ-12, [49]) and tested  
146 for consumption of drugs (urine-based multi-panel drug test, nal von minden; Moers,  
147 Germany) and alcohol (saliva-based alcohol test, ultimed; Ahrensburg, Germany). Elderly  
148 participants with intraocular lens replacements (IOLs) were allowed to be included in the  
149 study, with their lenticular status (i.e. whether they have an IOL) recorded as a binary  
150 variable<sup>2</sup>.

151 **Study protocol.** Participants performed a range of natural tasks in common everyday lighting  
152 conditions as well as a 10-minute dark- and a 14-minute laboratory-based part during a ~1-  
153 hour ambulatory protocol (~300-360 samples in total) while their approximate corneal  
154 spectral irradiance and pupil size were measured. Given the 10 second sampling interval,  
155 each task and light condition took at least 60 seconds to ensure collecting enough valid  
156 samples per condition. Details about the tasks and the experimental procedure are given in  
157 Supplementary Table 1.

158 **Light settings.** During the natural conditions, light sources included fluorescent room  
159 lighting, LED lighting (room lighting, laptop screen) and sun light through the windows as  
160 well as outdoors. Participants moved in and between indoor and outdoor environments and  
161 engage in a range of everyday tasks while illuminance ranges from ~5 lux to many thousands  
162 of lux (upper end depending on weather conditions). Example scenarios are shown in Fig.  
163 1E-F.

164 In the laboratory-based part, the light source was a vertical front panel (220 cm width, 140  
165 cm height) mounted 80 cm above floor level. It consists of 24 LED panels (RGB + White),  
166 each containing 144 LEDs (total of 3456 LEDs; peak emission wavelengths at maximum  
167 intensity for RGB primaries: blue – 467 nm, green – 527 nm, red – 630 nm). The panel is  
168 covered with a diffuser film. Lighting scenarios were set up using DMXControl (Version

169 2.12.2) software (DMXControl Projects e.V., Berlin, Germany). Participants were seated on a  
170 chair in front of the light panel for 14 minutes (~75 cm distance to the eyes, height varying  
171 with participants' height, ~90-140 cm) and instructed to gaze at a cross in the middle of the  
172 panel. The light setup comprises 4 spectrally different 3-minute phases of light (appearance:  
173 "red", "blue", "green", "white"). The 4 phases are randomized in order and embedded in 20  
174 second dark phases (<0.2 lux before and after each light phase). Each 3-minute light phase  
175 contains 3 different illuminance levels (10 lux, 100 lux and 250–1000 lux) in ascending  
176 order, each level lasting 1 minute. The "red" and "blue" conditions reach their maximum  
177 illuminance at 480 lux and 250 lux, respectively, whereas "green" and "white" reach 1000  
178 lux. In total the light setting adds up to 13 minutes and 40 seconds duration. The laboratory  
179 setup is shown in Fig. 1F.

180 *Calibrated spectroradiometric measurements.* Irradiance spectrum in the approximate  
181 corneal plane was recorded with a calibrated research-grade commercial small-footprint  
182 spectroradiometer (STS-VIS, Ocean Insight Inc., Oxford, UK; Fig. 1A), measuring in the  
183 range of 350-800 nm with a wavelength accuracy of  $\pm 0.13$ nm and optical resolution of 6 nm  
184 (100  $\mu$ m slit). The STS measures with a signal-to-noise ratio of >1500:1 and dynamic range  
185 of 4600:1. Integration times will be pre-set to range from 10  $\mu$ s – 5 s. Attached to the STS  
186 was a direct-attach cosine corrector (CC-3-DA, diameter: 7140  $\mu$ m) with 180° field of view.

187 The spectroradiometer was covered by a customized 3-D-printed case (Fig. 1A), adjustable in  
188 angle and mounted on a wearable, padded headband, which can be adjusted for different head  
189 sizes. The mount was centred on the forehead, such that it is approximately conjoint with the  
190 corneal plane and in the direction of gaze of the observer. The vertical angle of the  
191 spectroradiometer lens was set pointing 15° below the horizontal at default for every  
192 participant, in correspondence to typical outdoor gaze angle [50]. Irradiance spectra were  
193 measured every 10 seconds and stored on a custom-made, portable Raspberry Pi-based  
194 microcontroller.

195 *Pupil size measurements.* An infrared video-based eye tracker (Pupil Labs GmbH, Berlin,  
196 Germany; Fig. 1A) was used to collect still photographs of the participant's pupil at the same  
197 time as the irradiance spectra. These still photographs (Fig. 1B) were then subjected to a 3D  
198 model estimated during a calibration procedure supplied by the eye tracker manufacturer.  
199 Images from the camera were polled using OpenCV and stored on the same microcontroller  
200 as the spectroradiometric measurements. The 3D model [51] assumes that the 3D pupil can  
201 be modelled as disk which in each moment is tangent to a rotating eye sphere. Elliptic pupil  
202 contours are extracted using a pupil segmentation and the center of the eye sphere is  
203 estimated using a nonlinear optimisation procedure (see below under "Pupil size estimation"  
204 in the "Data analysis" section). In the 3-minute-long video-based calibration procedure, the  
205 investigator verified that the 3D model could detect pupil size reliably during various head  
206 and eye movements and positions.

207 *Data analysis. Pupil size estimation.* Absolute pupil diameter in millimetres was estimated  
208 from the raw images using the Pupil Labs software (release version 1.15.71,  
209 <https://github.com/pupil-labs/pupil/releases>). The parameters for the intrinsic 3D model are

210 derived in the calibration stage and then applied on the pupil image sequence, yielding pupil  
211 diameter in millimetres.

212 *Processing of spectral data.* The spectral data reported by the spectroradiometer were given  
213 in irregular wavelength spacing and will be resampled to 1 nm intervals between 380 and 780  
214 nm (visible range) using energy-preserving interpolation. From the spectral data we  
215 calculated the melanopic irradiance and melanopic Equivalent Daylight Illuminance<sup>3</sup> (mEDI)  
216 using melanopsin spectral sensitivity curve obtained from the recent CIE S026/E:2018  
217 standard [9] incorporating a previously defined template-derived spectral sensitivity or  
218 melanopsin [52]. In addition to the melanopic irradiance and mEDI, we also calculated the  
219 photopic illuminance in lux based on the CIE 1924 photopic luminous efficiency curve.

220 *Data quality checks.* We implemented the following data quality checks:

- 221 • *Lack of good-quality fit.* The pupil size estimation method will in some cases not be  
222 able to find a pupil, due to extreme angles of gaze, or partial covering by eye lashes.  
223 Any images in which a pupil cannot be found or yields low detection confidence  
224 ( $< 0.6$ , as computed by the Pupil Labs software) was simply excluded. In a test run of  
225 the experiment, we found that  $\sim 30\%$  of all images have this problem. This number  
226 might seem high at first, but it is important to remember that participants are  
227 performing tasks in the real world and therefore will blink and move their eyes.
- 228 • *Pupil size screening.* Since the natural pupil can only vary in a maximum range  
229 between approx. 1 and 9 mm, any estimated pupil size (due to misestimation) outside  
230 of this range was excluded.
- 231 • *Proportion of excluded data.* For each participant, the proportion of excluded data  
232 points from the entire sample will be reported. Initially, we set the following  
233 threshold: If less than  $50\%$ <sup>4</sup> of data points are included, corresponding to a mere  
234 recording time of  $\sim 30$  minutes, we will exclude that participant altogether.
- 235 • *Positive control and quality of pupillometry data.* We confirmed that our  
236 measurement procedure was sensible and provide upper-bound estimates for data  
237 quality by conducting laboratory-based measurements of the dark-adapted pupil size  
238 as well as twelve different conditions of light-adapted pupil size early in the protocol  
239 (for details see section “light settings” and Figure 1).

240 *Recorded demographic and ancillary information.* We recorded ancillary information to  
241 describe the sample. Recorded covariates include gender, handedness, BMI, vision  
242 correction, date and time of experiment, time since waking up, sleep duration, acute and  
243 habitual caffeine consumption, chronotype, acute sleepiness, iris colour and weather during  
244 the experiment. Except for the last three, these covariates were retrieved via an online  
245 questionnaire which is filled out just before and during experiment protocol.

- 246 • Iris colour and weather were rated by the experimenter. The former based on a 3-point  
247 Likert-scale item using iris colour categories “brown”, “hazel-green” and “blue” [53],  
248 rated before the begin of the protocol and the latter on a self-created 4-point Likert-  
249 scale item, incorporating the options “overcast”, “cloudy”, “partly cloudy” and

- 250 “sunny”, rated at the beginning of the outdoor part of the protocol (timestamp 16 in  
251 Supplementary Table 1).
- 252 • Acute sleepiness was estimated with a German paper-pencil version of the Karolinska  
253 Sleepiness scale [54], both at the beginning and end of the protocol (timestamp 1 and  
254 29 in Supplementary Table 1). The 9-point Likert-scale item ranges is labelled on all  
255 odd steps.
  - 256 • Both the habitual and acute caffeine consumption questionnaires were developed  
257 based on median values of the caffeine content ranges in mg for typical caffeinated  
258 beverages and food items [55]<sup>5</sup>. Each questionnaire comprises 18 items (15 on  
259 beverages, 2 on chocolate and 1 for caffeine pills). Each item asks the participant to  
260 indicate how many portions of the caffeinated item were consumed on a scale from 0  
261 (no) portion to 8 portions. Every item portion matches a specified typical portion size  
262 in ml or g and a caffeine content in mg. While the “habitual” questionnaire is asking  
263 for intake on an average day, the “acute” questionnaire queries the same items with  
264 regards to the last 6 hours. For both habitual and acute intake, an absolute sum and a  
265 relative sum value of caffeine in mg (divided by weight in kg) are computed for every  
266 participant. The two questionnaires were filled out during the protocol as part of a  
267 “laptop task” (timestamp 12 in Supplementary Table 1).
  - 268 • Chronotype was queried with a German translation of the  $\mu$ MCTQ, an ultra-short  
269 version of the Munich ChronoType Questionnaire [56]. It comprises six core  
270 questions, allowing for a quick and efficient assessment of chronotype. The indicating  
271 value for chronotype is computed as the midpoint of sleep on work-free days  
272 corrected by potential sleep debt ( $MSF_{SC}$ ). Sleep duration and time since waking up  
273 are assessed from answers to four simple open-ended questions. Participants indicate  
274 the times of falling asleep and waking up concerning the night before the experiment  
275 as well as the duration of potential naps took on the day of and before the experiment.  
276 Sleep duration is computed by subtracting time of waking up from time of falling  
277 asleep and adding nap duration. Time since waking up is computed as the time  
278 starting to fill out the questionnaire minus the time of waking up. Both the  $\mu$ MCTQ  
279 and the questions concerned with sleep duration and time since waking up were filled  
280 out early in the protocol as part of a “laptop task” (timestamp 4 in Supplementary  
281 Table 1).
  - 282 • Gender, handedness, BMI (computed from weight and height) and vision correction  
283 (“no correction”, “minus correction” or “plus correction”) were assessed via simple  
284 demographic items as part of the online questionnaire, filled out just before the  
285 beginning of the protocol. Date and time of the experiment were logged by the start of  
286 filling out that online questionnaire.

287 These parameters were recorded to describe the sample and not used in our confirmatory  
288 hypotheses tests<sup>6</sup>.

289 *Analytic strategy.* We used a linear mixed model framework to examine our three  
290 confirmatory hypotheses and examine evidence for each of our three hypotheses using Bayes  
291 Factor [57]. The general logic in this approach is that a ‘full’ model containing a factor under

292 consideration is compared to a ‘null’ model missing that factor using the likelihood ratio  
293 between the two models. If the factor affects the variable in question (pupil size), this will be  
294 reflected in higher Bayes Factors. We consider a BF of 10 as “strong” evidence, following  
295 standard categorisations [58]:  $1 < \text{BF} < 3$  – anecdotal evidence,  $3 < \text{BF} < 10$  – moderate,  $10$   
296  $< \text{BF} < 30$  – strong evidence, and  $\text{BF} > 30$  – very strong evidence,  $\text{BF} > 100$  – decisive  
297 evidence<sup>7</sup>. We assess three confirmatory hypotheses independently and convert the Bayes  
298 Factors obtained to this scale of evidence. The analysed relationship between pupil size and  
299 light refers to simultaneously taken samples of those variables.

300 Our first confirmatory hypothesis (CH1) tests whether melanopsin sensitivity-weighted  
301 irradiance predicts our pupil size. The formulation of the full model in Wilkinson-Rogers  
302 notation [59] is as follows:

303 CH1 (Full model): Pupil size  
304 
$$= \text{Melanopic irradiance}^8 + \text{Age} + (1|\text{Participant ID}) + (1|\text{Sex})$$

305 This full model is compared to the null model not containing melanopsin irradiance:

306 CH1 (Null model): Pupil size =  $\text{Age} + (1|\text{Participant ID}) + (1|\text{Sex})$

307 The second confirmatory hypothesis tests if melanopsin sensitivity-weighted retinal  
308 illumination better predicts pupil size than the weighted sum of L- and M-cone-weighted  
309 retinal illumination (CIE 1931 *Y*, photopic illuminance). We express this full model as:

310 CH2 (Full model): Pupil size  
311 
$$= \text{Melanopic irradiance}^9 + \text{Age} + (1|\text{Participant ID}) + (1|\text{Sex})$$

312 Here, the null model is:

313 CH2 (Null model): Pupil size  
314 
$$= \text{Photopic illuminance}^{10} + \text{Age} + (1|\text{Participant ID}) + (1|\text{Sex})$$

315 Our third confirmatory hypothesis will test if pupil size changes as a function of age, with  
316 higher age associated with a smaller pupil size. We express the full model as:

317 CH3 (Full model): Pupil size  
318 
$$= \text{Melanopic irradiance}^{11} + \text{Age} + (1|\text{Participant ID}) + (1|\text{Sex})$$

319 Here, the null model is:

320 CH3 (Null model): Pupil size =  $\text{Melanopic irradiance}^{12} + (1|\text{Participant ID}) + (1|\text{Sex})$

321 *Power analysis.* There were no prior data allowing us to conduct a meaningful power  
322 analysis. The largest (to our knowledge) study examining the relationship between pupil size  
323 and illuminance [28] only used one spectral stimulus (scaled to different illuminances). We  
324 considered the question of power as follows. In hypothesis CH1, we aimed to confirm the  
325 light-level dependence of pupil size. Unless a participant has an undetected neurological or  
326 retinal condition leading to immobility or paradoxical behaviour of the pupil, the light-level  
327 effect will be present in all individuals. Therefore, the effect is nearly guaranteed to exist in a  
328 given individual. In hypothesis CH2, we examined whether melanopic irradiance was a better



329 predictor for pupil size than photopic illuminance. From our previous work, we know that the  
330 spectral sensitivity of pupil size is best described using melanopsin rather than photopic  
331 luminosity [15]. In the laboratory part of the experiment, we near-recreate these conditions  
332 using narrowband LED lights. Regarding hypothesis CH3, we were confident in the study's  
333 power to detect effects of age on pupil size in an age-diverse sample ( $N=96$ ). Very stable  
334 effects of age on pupil size were shown in a comparable sample ( $N=91$ , [28]). Our sample  
335 size (96 individuals) was governed by our resource limitations.

336 *Data collection termination rules.* Data will be collected until our resource limit (96  
337 participants and study personnel hours) is reached.

338 **Data accessibility.** All code and data are publicly available as part of this publication. Code,  
339 raw and processed data (except code to drive the acquisition device, which is proprietary) are  
340 available on GitHub ([https://github.com/tscnlab/LazarEtAl\\_RSocOpenSci\\_2023](https://github.com/tscnlab/LazarEtAl_RSocOpenSci_2023)) under the  
341 MIT license. Raw data (<https://doi.org/10.6084/m9.figshare.24230848.v1>) and supporting  
342 material (<https://doi.org/10.6084/m9.figshare.24230890.v1>) are available on FigShare under  
343 the [CC-BY 4.0](https://creativecommons.org/licenses/by/4.0/) license. The in-principle accepted Stage 1 protocol can be found here:  
344 (<https://osf.io/zrksf/>).

345 **Ethical approval.** Ethical approval has been granted from the cantonal ethics commission  
346 (Ethikkommission Nordwest- und Zentralschweiz, project ID 2019-01832, see Supporting  
347 materials on [FigShare](#)). All current mandatory measures to prevent the spread of COVID-19  
348 in Switzerland were implemented during data collection.

349 **Known limitations of this registered report.** We acknowledge that our study is limited with  
350 respect to following aspects:

- 351 • *Other, small-scale determinants of pupil size are ignored.* In this work, we are  
352 agnostic to other determinants of pupil size, such as fatigue [60], attentional processes  
353 [61, 62], recognition [63], high-level image content [64], target detection [65], mental  
354 effort [63, 66], arousal [67] and substance use [68]. These top-down effects are  
355 expected to be transient and relatively small in effect compared to the light and age  
356 effect [2, 35]. In addition, due to the near triad comprising convergence eye  
357 movements and ocular accommodation, viewing distance affects pupil size due to a  
358 shared neural pathway [1].
- 359 • *Estimation of retinal illuminance in natural vision.* In this study, we were using an  
360 irradiance sensor near the corneal plane, placed on the forehead and adjusted to  
361 typical outdoor gaze angle (15° below the horizontal, [50]). Given the geometry of the  
362 sensor and human head, this is the closest we can get to measuring corneal  
363 illuminance. It is impossible to estimate retinal illuminance using sensors in the real-  
364 world under freely changing geometries and gaze positions.
- 365 • *Light history.* In the present study, we are omitting effects of prior light exposure (e.g.  
366 before the experiment) and light sequence effects during the protocol on pupil size.  
367 The protocol procedure of the field experiment is held constant across participants  
368 (except for the randomized light phases in the laboratory-based part of the  
369 experiment)



370 • *Omitting scene radiance.* In the present study we did not measure spectral radiance  
371 but spectral irradiance. By doing this, we neglect effects of variation in light level  
372 across the field of view in different light scenes. Given the limitations of the real-  
373 world setting, the technical properties and calibration of the available instruments,  
374 collecting real-world radiance data and artificially limiting the angular acceptance of  
375 our spectroradiometer is not feasible in the present study.

## 376 Results

377 We carried out the experiment according to the Stage 1 protocol, which was accepted in  
378 principle (<https://osf.io/zrksf/>). All LMM analyses were performed in R (v. 4.3.1) [69] using  
379 the BayesFactor package (v. 0.9.12-4.5) [70]. The "ggplot2" package (v. 3.4.3) [71] was  
380 utilized for data visualization. More details are available in the supplementary information.

381  
382 In the following, we first report participant characteristics and quality check analyses. We  
383 then present the results of our confirmatory hypotheses using a final sample of 83 participants  
384 and  $\log_{10}$ -transformed light data. For transparency and completeness, we also report the  
385 results of our hypothesis tests in the linear, non-transformed light data despite the violation of  
386 linear assumptions both in the full ( $n=83$ , 75% data loss threshold) and in the reduced sample  
387 of 63 participants (50% data loss threshold). Finally, we summarise our post-hoc analyses.

388 ***Participant recruitment.*** Details of the recruitment process are presented in the study flow  
389 diagram (Suppl. Figure 1). Following our recruitment plan of the approved Stage 1  
390 registration, data was collected until we reached our resource limit. Due to difficulties filling  
391 the older age groups during the COVID-19 pandemic, we later opened recruitment to more  
392 than 16 per age group to achieve a large enough total sample. In total,  $n=113$  volunteers were  
393 invited to the health and eligibility screening. Seven did not meet the inclusion criteria – five  
394 because of the visual tests and two for health reasons and medication with potential influence  
395 on pupil regulation. The remaining 106 subjects were allocated to the protocol. While  $n=87$   
396 completed the trials without problems with the equipment, data from  $n=19$  volunteers' trials  
397 were invalid due to technical problems (cable issue, camera slippage or software/format  
398 errors) and had to be excluded. A further four participants were then removed before the final  
399 analysis because more than 75%<sup>13</sup> of their pupil data were of insufficient quality (see *Data*  
400 *quality checks*), leaving  $n=83$  for the final analysis. Given the resource limitations mentioned  
401 above, this sample remained as the final sample for statistical analysis.

402 ***Participant characteristics.*** Table 1 presents sample characteristics based on self-report  
403 separately for participants who were included ( $n=83$ ), excluded after the study ( $n=23$ ), and  
404 excluded before the study ( $n=7$ ). Among the 83 volunteers included in the final analyses (43  
405 female, 40 male;  $M_{\text{age}} = 35.70$ ,  $SD_{\text{age}} = 17.16$ ;  $M_{\text{BMI}} = 22.96$ ,  $SD_{\text{BMI}} = 3.47$ ), age groups were  
406 not balanced as planned initially (16 per group), and the final sample is skewed towards  
407 younger age, with 30 included volunteers aged 18-24 years and five included volunteers over  
408 64. This is also depicted in Figure 2, where the included sample is stratified by sex. Notably,  
409 the volunteers excluded before the trial were clearly older on average and with higher BMI  
410 ( $M_{\text{age}} = 52.00$ ,  $SD_{\text{age}} = 21.54$ ,  $M_{\text{BMI}} = 26.39$ ,  $SD_{\text{BMI}} = 5.79$ ).

411 A total of 40 included participants took part in the experiment during summer, 20 during  
412 winter, 16 during autumn and 7 during spring. Weather conditions varied between light rain  
413 (11%), very cloudy (19%), cloudy (17%), somewhat cloudy (13%) and sunny (40%).  
414 Differences in weather conditions during the trial were associated with different light  
415 intensity distributions. Figure 3 depicts the density of light intensity (mEDI) across the whole  
416 trial (upper panel) and stratified across the weather conditions (lower panel). Notably, in  
417 sunny weather, there is a higher probability density of mEDI values over 1000 lx than in all  
418 other weather conditions. Additional participant information like chronotype, sleep duration,  
419 start time of the experiment and acute and habitual caffeine consumption are given in Suppl.  
420 Table 2.

421 **Data quality checks.** The quality checks specified earlier in this report were applied and  
422 further supplemented by a check of linear assumptions for the hypothesized mixed linear  
423 models.

424 *Proportion of excluded data.* Any pupil images yielding low detection confidence ( $<0.6$ ) or  
425 exceeding the maximum range ( $<1$  or  $>9$  mm) were replaced by missing values, as were  
426 saturated spectroradiometer samples (after quick changes from dark to bright).  
427 Consequentially, we calculated the proportion of excluded data points for each participant  
428 (see Suppl. Table 3).

429 Initially, we had set a threshold of maximally 50% data loss per subject. Otherwise, we  
430 planned to exclude that subject altogether. As our dataset revealed a higher proportion of  
431 pupil data exclusion than expected from the pilot runs, this would have amounted to  
432 excluding an additional  $n=24$  (out of  $n=87$ ) participants from the final analysis (cf. Figure 4).  
433 Thus, to address high participant attrition, we decided to additionally determine a second  
434 adjusted threshold of “acceptable” data loss proportion per participant after Stage 1 in  
435 principle acceptance (IPA).

436 We determined a second sensible “data loss threshold” in a data-driven analysis of a “scree-  
437 like” plot. The criterion was to find the location beyond the 50% threshold, where increasing  
438 the threshold in 5% steps would lead to a minimally increased number of excluded  
439 participants. As depicted in Figure 4, this procedure resulted in adopting a second data loss  
440 threshold of 75% excluded data points per participant, with  $n=4$  (out of  $n=87$ ) exceeding the  
441 new threshold with values of 81.60%, 85.48%, 91.67 %, and 95.65%.

442 In the remaining dataset of  $n=83$  (all conditions), a total of 17199 observations with good-  
443 quality pupil and light data were retained. The full dataset is separated into “field data”  
444 (10082 valid observations), “dark data” (2871 valid pupil observations), and “lab data” (3698  
445 valid observations). There were also residual “transition samples” (548 valid observations)  
446 taken between the laboratory and field conditions that were not used in the analyses because  
447 they could not be clearly assigned to either condition.

448 Data loss per included participant ranges from 10.82% to 70.64% as listed in Suppl. Table 3.  
449 Furthermore Suppl. Tables 3 and 4 display a summary of minimum, median and maximum  
450 values for mEDI and pupil size, separated for field and positive control data (laboratory and

451 dark adaptation conditions), respectively. Only observations from the field condition with  
452 retained pupil and light data were used for confirmatory hypothesis testing.

453 *Linear Regression Assumptions.* We discovered a peculiarity in the originally formulated  
454 linear mixed model analyses after receiving Stage 1 IPA and collecting data. When predicting  
455 pupil size with linear light intensity data (mEDI/melanopic irradiance and photopic  
456 illuminance), these variables violate the assumptions of linear regression models, specifically  
457 the assumptions for linearity, homogeneity of variance and collinearity (see Suppl. Figure 2  
458 B, C and E). When light data were  $\log_{10}$ -transformed prior to inclusion in the linear models,  
459 the requirements were approximately met (see Suppl. Figure 3), suggesting transformation.  
460 We additionally tested whether the transformation improved the fit in the LMM, comparing  
461 the model with  $\log_{10}$  transformation against a null model with linear light data in the same  
462 procedure as the hypothesis tests in the pre-registered analysis. As shown in Suppl. Table 5,  
463 the resulting likelihood ratio clearly favours the model with  $\log_{10}$  transformed light data  
464 ( $BF_{10}=5.678918e+996 \pm 3.55\%$  pe), corresponding to “decisive evidence” in favour of a  
465  $\log_{10}$ -transformation. For completeness and transparency, we report the results of our  
466 hypothesis tests both with transformed and non-transformed data.

467

468 *Positive control data.* Two conditions were included in the experiment as a manipulation  
469 control: First, a 10-minute dark adaptation to test whether the age effect is generally present.  
470 Second, a laboratory light condition in which different light colours allow stronger  
471 dissociation between photopic illuminance and mEDI values (see *Light settings*), to confirm  
472 that mEDI determines pupil size in the light-adapted pupil and is superior as a predictor  
473 compared to photopic illuminance.

474 The recorded light intensities from the laboratory condition, contrasted with the field  
475 conditions, are shown in Figure 5. In comparison to the extremely high positive correlation  
476 between photopic illuminance and mEDI under uncontrolled field conditions ( $r=.999$ , see  
477 panel B), the laboratory condition yielded a clearly lower positive correlation ( $r=.309$ , see  
478 panel A). We tested confirmatory hypotheses CH1 and CH2 with the linear models specified  
479 in stage 1 of this report with data from these low-correlation laboratory conditions. Both  
480 hypotheses are supported by decisive evidence ( $BF_{10}>100$ ). This is the case for the full  
481 sample ( $n=83$ , 70% threshold) as well as the reduced sample ( $n=63$ , 50% threshold) and with  
482  $\log_{10}$ -transformed as well as linear light data (see rows 1-4 of Suppl. Tables 6, 7,  
483 respectively).

484 Testing the age effect under dark conditions, we compared a model including age as a  
485 predictor vs. the null model without it. The third row of Suppl. Tables 6 and 7, present the  
486 tested models and results in the full sample ( $n=83$ , 70% threshold) and reduced sample  
487 ( $n=63$ , 50% threshold), respectively. Both provide decisive evidence ( $BF_{10}>100$ ) for age as  
488 an influencing factor on pupil size during dark adaptation.

#### 489 *Confirmatory analyses*

490 *Pupillary light reflex.* Hypothesis CH1 proposed that pupil size is dependent on the  
491 (melanopsin sensitivity-weighted) light level under naturalistic steady-state conditions. Our

492 results from the LMM analysis (n=83, 70% threshold) provide decisive evidence ( $BF_{10}>100$ )  
493 for that hypothesis, both when using the  $\log_{10}$ -transformed mEDI data (cf. Table 2, row 1)  
494 and the linear mEDI data in the full model (cf. Suppl Table 8, row 1). Notably, the likelihood  
495 ratio turns out to be magnitudes higher after  $\log_{10}$ -transformation compared to without it  
496 ( $BF_{10}=1.543255e+1288 \pm 2.20\%$  pe vs.  $BF_{10}=2.642936e+291 \pm 2.78\%$  pe, respectively).

497 Considering the reduced dataset (n=63, 50% threshold), the hypotheses tests produce  
498 qualitatively similar results, yielding decisive evidence for the full model and CH1  
499 ( $BF_{10}>100$ ), again for both the  $\log_{10}$ -transformed and linear data (cf. Suppl. Table 9, row 1  
500 and Suppl. Table 10, row 1). Likelihood ratios are larger in the full sample (see above)  
501 compared to in the reduced sample ( $BF_{10}=2.404706e+1076 \pm 2.24\%$  pe and  
502  $BF_{10}=1.031709e+242 \pm 2.24\%$  pe, respectively).

503 ***Predictive superiority of melanopsin sensitivity weighted measures.*** In hypothesis CH2, we  
504 tested whether mEDI was a better predictor of steady-state pupil size than photopic  
505 illuminance. The LMM results (n=83, 70% threshold) support this hypothesis with decisive  
506 evidence ( $BF_{10}>100$ ), both using the  $\log_{10}$ -transformed light data (see Table 2, row 2) and  
507 the linear mEDI data (see Suppl. Table 8, row 2). Once more, the likelihood ratio turns out to  
508 be several orders of magnitude higher after  $\log_{10}$  transformation than without  
509 ( $BF_{10}=1.458261e+21 \pm 2.13\%$  pe vs.  $BF_{10}=10708989894 \pm 3.91\%$  pe, respectively).

510 Looking at the reduced dataset (n=63, 50% threshold), the hypothesis tests yield qualitatively  
511 equivalent results, providing decisive evidence for the full model of CH2 ( $BF_{10}>100$ ), again  
512 for both the  $\log_{10}$ -transformed and linear data (see Suppl. Table 9, row 2 and Suppl. Table 10,  
513 row 2). The Bayes factors are again larger in the full sample (see above) than in the reduced  
514 sample ( $BF_{10}=1.782022e+19 \pm 2.06\%$  pe and  $BF_{10}=1921990 \pm 1.93\%$  pe, respectively).

515 ***Age effect in the light-adapted pupil.*** Hypothesis CH3 stated that light-adapted pupil size  
516 decreases (on average) with increasing age, a phenomenon also termed “senile miosis”.  
517 Results from the LMM (n=83, 70% threshold) support the notion that age is a significant  
518 factor for pupil size with decisive evidence ( $BF_{10}>100$ ). This is the case when including  
519  $\log_{10}$ -transformed mEDI data (see Table 2, row 3) or linear mEDI data in the models (see  
520 Suppl. Table 8, row 3). The likelihood ratio comparing the full and null models, including the  
521  $\log_{10}$ -transformed data, was  $\sim 20$  times higher than the BF of the model comparison without  
522 transformation ( $BF_{10}=46076.190 \pm 2.17\%$  pe vs.  $BF_{10}=2221.5 \pm 2.66\%$  pe, respectively).

523 In the reduced data set (n=63, 50% threshold), the hypothesis test with the full model of CH3,  
524 including age and the  $\log_{10}$ -transformed mEDI data, leads to the same interpretation: Decisive  
525 evidence in favour of CH3 ( $BF_{10}=124.465 \pm 2.12\%$  pe; see Suppl. Table 9, row 3). However,  
526 the likelihood ratio for the full model of CH3, including age and the linear mEDI data, falls  
527 below 100 ( $BF_{10}=13.992 \pm 1.89\%$  pe, see Suppl. Table 10, row 3) and is therefore interpreted  
528 as “strong evidence” ( $BF_{10}>10$ ) for CH3 instead.

### 529 ***Post-hoc Analyses***

530 As an extension of our confirmatory hypotheses, we visualized the direction and magnitude  
531 of the tested age effects on pupil size, inspired by the work of Winn et al. [28]. We further

532 performed explorative analyses testing sex, iris colour and reported acute and habitual  
533 caffeine consumption (relative to body weight) as potential influence factors on light-adapted  
534 pupil size under real-world conditions. These analyses were not included in our Stage 1  
535 submission.

536 **Visualising the age effect.** Providing typical case data, Figure 6 depicts pupil size data from a  
537 young (18 years of age) and an old participant (87 years of age), plotted against mEDI,  
538 including dark adaptation and field data from the experiment. As can be seen from the  
539 maximum to minimum range (given by the coloured horizontal lines) and from the regression  
540 equation, the older participant has a clearly smaller baseline pupil diameter ( $\beta_0=3.82$  mm)  
541 and magnitude of pupillary light reflex ( $\beta_1=-0.462$  mm per log-unit mEDI) compared to the  
542 young subject (vs.  $\beta_0=6.26$  mm and  $\beta_1=-0.997$  mm per log-unit mEDI). Interestingly, the  
543 variation in pupil size within similar light intensities decreases markedly towards the high  
544 mEDI intensities.

545 Inspired by Winn et al. (cf. Figure 2 in [28]), Figure 7 visualises the direction and magnitude  
546 of the age effect across the full sample ( $n=83$ ) under different light condition clusters given in  
547 mEDI. Coloured squares depict each subject's median pupil size values under the respective  
548 condition plotted against age in years along with the interquartile range (see grey opaque  
549 bars). The linear regression lines are fitted to the median values, while the 95% confidence  
550 limits are indicated by the grey shade around the line.

551 Figure 7 Panel A shows the age effect during the 10-minute in-lab dark adaptation (data not  
552 used in the confirmatory analyses), while panels B-E depict the age effect under field  
553 conditions in log<sub>10</sub>-unit steps. In all light conditions, we see an apparent reduction of pupil  
554 size with increasing age (on average), consistent with the beta values in the regression  
555 equations given in each panel. Interestingly, the slopes and intercepts of the age effect  
556 decrease with increasing light intensity (mEDI) across all intensity clusters, as shown in  
557 Figure 8 A & B, along with the 95% confidence intervals given as error bars.

558 The magnitudes of the age effect (summarized in Figure 8 A) are highest in the dark-adapted  
559 pupil with pupil size reduction of  $\beta_1=-0.408$  mm per decade ( $CI_{95\%}=[-0.538, -0.279]$ ). Under  
560 field conditions between 1 and 10 lx mEDI, age-driven pupil size reduction amounts to  $\beta_1=-$   
561  $0.376$  mm per decade ( $CI_{95\%}=[-0.501, -0.251]$ ), between 10 and 100 lx mEDI, it amounts to  
562  $\beta_1=-0.195$  mm per decade ( $CI_{95\%}=[-0.297, -0.093]$ ), and between 100 and 1000 lx mEDI the  
563 age effect results in a reduction of  $\beta_1=-0.141$  mm per decade ( $CI_{95\%}=[-0.229, -0.053]$ ).  
564 Finally, in the brightest light conditions ( $>1000$  lx mEDI), the age effect estimation is  
565 smallest with  $\beta_1=-0.080$  mm per decade ( $CI_{95\%}=[-0.137, -0.023]$ ).

566 The intercepts of the age effect (Figure 8 B) range from fully dilated pupils at  $\beta_0=8.13$  mm in  
567 darkness ( $CI_{95\%}=[7.62, 8.64]$ ) to fully constricted pupils at  $\beta_0=2.57$  mm ( $CI_{95\%}=[2.35, 2.80]$ )  
568 under bright light field conditions ( $>1000$  lx mEDI). For the intermediate steps, field  
569 conditions between 1 and 10 lx mEDI yield a pupil size intercept of  $\beta_0=6.16$  mm  
570 ( $CI_{95\%}=[5.66, 6.65]$ ), field conditions between 10 and 100 lx mEDI, yield  $\beta_0=4.30$  mm  
571 ( $CI_{95\%}=[3.90, 4.70]$ ), while field conditions between 100 and 1000 lx mEDI results in  
572  $\beta_0=3.53$  ( $CI_{95\%}=[3.19, 3.88]$ ).



573 However, we find considerable inter-individual variability in pupil size, even among  
574 participants of similar age, at all mEDI levels. With increasing light intensity, this variability  
575 is reduced, showing a close resemblance to the laboratory data of Winn and colleagues [28]. It  
576 is also worth noting that the individuals' interquartile ranges of pupil size are lower during  
577 controlled ten-minute in-lab dark adaption but, under field conditions, decrease as the light  
578 intensity increases (cf. IQR in Figure 7A, B and E)

579 Figure 8 C depicts the maximum to minimum pupil size range in mm plotted against age in  
580 years across all subjects. Equivalent to pupil size under different light intensities (see Figure  
581 7 A-E), there is an apparent negative linear effect on pupil size range with  $\beta_1 = -0.356$  mm per  
582 decade ( $CI_{95\%} = [-0.482, -0.230]$ ) and an intercept of  $\beta_0 = 6.01$  mm ( $CI_{95\%} = [5.51, 6.51]$ ).

583 **Exploratory hypotheses.** According to the same LMM procedure as in the confirmatory  
584 analyses (see *Analytic Strategy* under *Materials and Methods*), we tested sex, iris colour, and  
585 caffeine consumption (habitual and acute) as potential factors influencing light-adapted pupil  
586 size under natural conditions in the full sample ( $n=83$ , 70% threshold). We derived the  
587 following exploratory hypotheses:

- 588 • EH1: Sex differences in light-adapted pupil size are present under real-world  
589 conditions.
- 590 • EH2: Light-adapted pupil size varies as a function of iris colour under real-world  
591 conditions.
- 592 • EH3: Light-adapted pupil size varies as a function of habitual caffeine consumption  
593 (relative to body weight) under real-world conditions.
- 594 • EH4: Light-adapted pupil size varies as a function of acute caffeine consumption  
595 (relative to body weight) under real-world conditions.

596 As summarised in Table 3, along with the corresponding model comparisons in  
597 Wilkinson-Rogers' notation [59], none of the additional factors tested for influence on  
598 light-adapted pupil size proved to be supported by evidence from our sample. We found  
599 strong evidence in support of the null models ( $BF_{10} < 0.1$ ) for sex and iris colour,  
600 suggesting that there are no sex differences in light-adapted pupil size under real-world  
601 conditions ( $BF_{10} = 0.070 \pm 1.44\%$  pe, see Table 3, row one) and that pupil size does not  
602 vary as a function of iris colour ( $BF_{10} = 0.017 \pm 2.86\%$  pe, see Table 3, row two). We also  
603 observed moderate evidence in support of the null models ( $BF_{10} < 1/3$ ) for habitual and  
604 acute caffeine consumption per body weight [mg/kg], suggesting that neither habitual  
605 ( $BF_{10} = 0.131 \pm 2.10\%$  pe, see Table 3, row three) nor acute caffeine consumption within  
606 the last six hours ( $BF_{10} = 0.176 \pm 2.10\%$  pe, see Table 3, row four) had a significant effect  
607 on pupil size in our sample under real-world conditions.

608

## 609 Discussion

610 Here, we conducted a real-world experimental study using a novel ambulatory setup to  
611 perform confirmatory analyses of age effects and effects of spectrally weighted illumination  
612 on light-adapted pupil size. To this end, we measured light-adapted pupil size and spectral



613 irradiance during ecologically relevant tasks in everyday indoor and outdoor environments  
614 under naturalistic lighting conditions in a healthy, age-diverse and gender-balanced sample.

615 **Positive Control data.** Our laboratory data analyses as positive control indicated that our  
616 measurements were valid and that our confirmatory hypotheses were supported by decisive  
617 evidence, consistent with prior in-lab work [11-14, 19-21].

618 However, despite our prior test runs, we underestimated data loss due to the many possible  
619 interference factors when performing ecologically relevant tasks in dynamic real-world  
620 conditions. Therefore, we adjusted our initial data loss threshold to avoid high participant  
621 attrition. In our confirmatory analyses, we consistently reported both the full and a reduced  
622 dataset, showing that while the interpretation did not change, the likelihood ratios in support  
623 of the hypotheses were higher in the larger sample.

624 **Log<sub>10</sub>-transformation of light intensity.** To deal with the unanticipated violation of linear  
625 regression assumptions when including the light data as predictors, we log<sub>10</sub>-transformed  
626 them, which resolved the issue. However, this step was not planned in our Stage 1 Registered  
627 Report, which led us to always report both transformed and untransformed data in our  
628 confirmatory analyses for full transparency.

629 Besides statistical reasons, predicting pupil size employing a log<sub>10</sub>-transformed light unit also  
630 conceptually makes sense. Light exposure under naturalistic conditions spans several orders  
631 of magnitude (up to a factor of 10<sup>10</sup>) [3, 72]. It has been suggested that the visual system  
632 performs some type of logarithmic compression, not least as it enables scaling of signals  
633 according to their proportions rather than absolute scale owing to the difference in solar  
634 irradiance [73, 74]. The melanopsin-encoded component of ipRGCs appears to operate in a  
635 log-linear fashion, there by encoding irradiance across several orders of magnitude [75, 76].  
636 This is consistent with the finding in our dataset that the log<sub>10</sub> transformation clearly  
637 improves the pupil size prediction when compared to the linear scaled data.

638

639 **Pupillary light reflex in the field.** Decisive evidence from our field data confirms the  
640 presence of the pupillary light reflex under natural conditions (CH1). We expected this effect  
641 to be present in all participants unless they had an unrecognised medical condition.

642 We found distinct dose-response curves for the case data presented in Figure 6, with smaller  
643 pupil sizes observed at brighter conditions. The resulting curves closely resemble the model  
644 predictions based on laboratory luminance data shown in Figure 1 C [35]. Interestingly, the  
645 variation in pupil size within similar light intensities decreases markedly towards the high  
646 mEDI intensities. This finding may reflect that the pupillary light reflex dominates pupil  
647 regulation at high light intensities, whereas, at lower intensities, there is room for variation  
648 due to the other effects on pupil size, such as accommodation or emotional and cognitive  
649 responses.

650 **Predictive superiority of melanopsin sensitivity weighted measures.** Despite the extremely  
651 high correlation between photopic illuminance and mEDI under our field conditions, the  
652 analysis revealed the clear superiority of melanopsin-sensitivity weighted measures over  
653 photopic illuminance in predicting light-adapted pupil size under our natural light and task  
654 conditions (CH2). This effect was robust across the reduced and full dataset and log<sub>10</sub>-

655 transformed and linear light data. Our finding confirms evidence from laboratory studies  
656 suggesting that mean steady-state pupil size under photopic conditions is primarily controlled  
657 by the melanopsin-encoded signal [11-16].

658 These findings provide a clear call to action: The application of melanopsin-weighted  
659 measures (e.g., mEDI) should be extended beyond the laboratory, which is likely to lead to  
660 significant improvements in pupil size prediction compared to photopic illuminance.

661 ***Age effect on pupil size.*** In line with previous laboratory findings [19-28], our data  
662 confirmed that steady-state pupil size decreases with age, even under uncontrolled real-world  
663 conditions. In addition, our exploratory results replicate that the effect is stronger in dim  
664 compared to bright light conditions [13, 24, 28, 29, 77]. Perhaps the most compelling  
665 findings are the consistent linear regression parameters between our data and the laboratory  
666 data presented in Figure 2 by Winn et al. in 1994 [28]. Both studies indicate that under dim  
667 light conditions, ageing reduces pupil size by about 0.4 mm per decade, starting at ~8 mm  
668 intercept. Surprisingly, the clustered field data also closely match the effect magnitudes in the  
669 laboratory, as reported by Winn and colleagues. In line with this pattern, our data extend to  
670 even brighter daylight conditions, where the age effect is even more reduced, and pupils are  
671 likely fully constricted. Lastly, just like in the findings of Winn and colleagues, our data also  
672 show “a substantial amount of interindividual variation in pupil size for subjects of similar  
673 age” [cf. 28p. 1134] and decreasing variation with increasing brightness.

674 In summary, age reduces pupil size in the real world, especially at lower light intensities,  
675 albeit with large inter-individual variability. This provides further support for considering  
676 age-related differences in lighting solutions for visual and non-visual optimisation, as smaller  
677 pupil sizes result in reduced retinal illumination. A study by Gimenez et al. [78] suggests that  
678 light-induced melatonin reduction in healthy young people might adapt to long-term  
679 reductions in short-wavelength light through filters. Whether this is the case in an older  
680 population experiencing symptoms of the ageing eye, such as lens yellowing, photoreceptor  
681 loss and pupil size reduction, remains an important research question. Prior evidence suggests  
682 that there are some compensatory mechanisms at play in ageing [79].

683 ***Other potential factors affecting pupil size.*** Derived from the literature, sex, iris colour, and  
684 caffeine consumption were investigated as potential influencing factors. Previously, Abokyi  
685 et al [68] found that acute caffeine intake of 250 mg significantly increased pupil diameter  
686 from 30 to 90 minutes after ingestion. In contrast, our data show no evidence that caffeine  
687 intake “within the last six hours” or habitual caffeine consumption affect light-adapted pupil  
688 size. This discrepancy may be due to the inaccuracy of the used subjective reports as well as  
689 the imprecise report of timing and dosage of caffeine consumption in our study.

690 Our evidence against the occurrence of sex differences contrasts with the work of Harley &  
691 Sliney [47], who found that female subjects had significantly larger pupil sizes (0.30 mm on  
692 average) than male subjects under outdoor conditions. On the other hand, our results are in  
693 line with Winn et al. [28], who found no sex differences in their sample. The body of  
694 evidence for sex differences in pupil size therefore remains inconclusive. However, the lack

695 of evidence in our data for iris colour as an influence factor for pupil size is consistent with  
696 both reports[28, 47].

697 **Further limitations.** In addition to the list of study restrictions acknowledged in the Stage 1  
698 Registered Report (see *Materials and Methods*), our study is limited in the following ways:

- 699 • *Time-resolution.* Given our temporal sampling resolution (10-second intervals), we  
700 may not have been able to capture some of the faster dynamics of pupil size, possibly  
701 stemming from cone signalling pathways [17, 18]. A finer time resolution would  
702 allow a more detailed analysis of the fast response aspects of pupil size regulation and  
703 the velocity of adaptation.
- 704 • *Exhaustive light scenarios.* We have not sampled all possible light scenarios and have  
705 limited our design to those that balance feasibility with full generalisability. As the  
706 actual statistical properties of the human spectral diet are unknown, this  
707 generalisability remains a construct.
- 708 • *Carry-over effects.* We acknowledged the omission of light history effects in Stage 1  
709 and further found high autocorrelations values for pupil size and mEDI in our field  
710 data (see Suppl. Figure 4). It is thus plausible that our data include carry-over effects  
711 so that long-term pupil effects are mixed into the instantaneous measurements.  
712 However, this is a feature of naturalistic exposures in the real world. A clean but non-  
713 naturalistic design could employ counterbalanced sequences of light levels.

## 714 **Conclusion**

715 While acknowledging the limitations and high data loss, this study is the first to the authors'  
716 knowledge to investigate the pupillary light reflex under naturalistic light and task conditions  
717 enabled by a fully wearable measurement setup. Under these dynamic real-world conditions,  
718 the study sheds light on the factors influencing human pupil physiology in a sex-balanced,  
719 age-diverse sample. Using a Bayesian approach, we confirmed previous laboratory findings  
720 on senile miosis, the dose-response relationship between pupil size and light intensity, and  
721 the superiority of melanopsin-weighted measures over photopic illuminance for predicting  
722 steady-state pupil size. Our post-hoc analyses show moderate to strong evidence that iris  
723 colour, reported caffeine consumption, and sex did not substantially influence pupil size  
724 under these settings. Taken together, the data provide a strong case for considering age in  
725 personalised lighting solutions and for extending the use of melanopsin-weighted light  
726 measures to assess real-world lighting conditions for visual and non-visual functions.

727 **Figure captions**

728

729 **Figure 1:** *A* Glass mannequin head with ambulatory measurement setup, incorporating infra-  
730 red eye tracker, small-footprint spectrometer, as well as a control computer (Raspberry Pi)  
731 and a power bank. *B* Example images under two different illumination conditions varying  
732 across 3 orders of magnitude recorded with our setup. *C* Predictions of the [35] for two  
733 observers (20-year-old vs. 80-year-old). *D-F* Indoor (*D*), outdoor (*E*) and laboratory lighting  
734 situations (*F*).

735 **Figure 2:** Included sample (n=83) stratified for age groups and sex. Green bars on the left  
736 depict female, and violet bars on the right depict male participants. The sample is skewed  
737 towards younger age groups, especially for female participants.

738

739 **Figure 3:** Density of light intensity (melanopic EDI) across all observations in the field  
740 conditions (n=83, top panel) and stratified across the weather conditions (bottom panel). The  
741 dotted and solid vertical grey lines indicate intensities of 250 lx mEDI and 1000 lx mEDI,  
742 respectively. Bin breaks in the histogram (top panel) correspond to half log<sub>10</sub>-unit steps of  
743 mEDI. Box plots in the density violin plots (bottom panel) include the median (black square)  
744 along with the interquartile range (IQR, black rectangle) under each weather condition. The  
745 “whiskers” mark the values below the 1<sup>st</sup> and beyond the 4<sup>th</sup> quartile. Sunny weather is  
746 associated with a larger proportion of >1000 lx mEDI values.

747

748 **Figure 4:** Excluded participants as a function of possible data loss thresholds (black line).  
749 The initial data loss threshold (50%) is marked by the dashed blue vertical line, yielding n=24  
750 excluded participants. The adjusted threshold (dashed magenta line) was placed at the  
751 location over 50%, which marks the smallest increase of excluded participants (+0, from 75  
752 to 80%)) across possible thresholds in 5% steps, yielding n=4 excluded participants and  
753 retaining n=83.

754

755 **Figure 5:** (*A-B*) Relationship between melanopic and photopic light units contrasted between  
756 laboratory conditions (*A*) and field conditions (*B*). Pearson correlation coefficients quantify  
757 the association. The laboratory data clearly show a dissociation between the light intensity  
758 units, whereas, under field conditions, these units are highly correlated.

759

760 **Figure 6:** Age comparison of typical pupil size data as a function of melanopic Equivalent  
761 Daylight Illuminance (mEDI). The scatterplots show data from the field and dark conditions  
762 of a young (18 years of age, left panel) and old participant (87 years of age, right panel). The  
763 regression line and equation demonstrate the linear relationship between log<sub>10</sub>-transformed  
764 mEDI values in lux and pupil diameter in mm. The coloured horizontal lines mark each  
765 subject's minimum and maximum pupil diameter values. A reduced pupil dilation in the  
766 lower light intensities is visible for the older subject.

767

768 **Figure 7:** (*A-E*) Median values of pupil size per subject (n=83) as a function of age during  
769 different light conditions. *A* In the 10-minute laboratory-based dark adaptation condition. *B*  
770 In Field conditions between 1 and 10 lx mEDI. *C* In Field conditions between 10 and 100 lx

771 mEDI. **D** In Field conditions between 100 and 1000 lx mEDI. **E** In Field conditions over  
772 1000 lx mEDI. The coloured squares display the median values per subject along with the  
773 interquartile range (IQR, opaque grey bars). The equations and regression lines, including the  
774 95% confidence intervals (grey line shade), demonstrate the linear relationship between age  
775 in years and median pupil diameter in mm across the different clusters of light intensities  
776 during the experiment. Field data (**B-E**) were included in the confirmatory hypothesis  
777 analysis, while dark data (**A**) was only used in the positive control analysis. The effect of  
778 ageing is reduced as the intensity of the light increases.

779 **Figure 8:** (**A-B**) Slopes (**A**) and Intercepts (**B**) of the linear regressions for median pupil size  
780 as a function of age (in decades), plotted per light intensity cluster. Error bars give the 95%  
781 confidence intervals of the parameters. The slopes and intercepts of the age effect and their  
782 95% confidence intervals continuously decrease with increasing light intensity (cf. Figure 7).  
783 **C** Pupil size range (maximum-minimum diameter in mm) as a function of age in years. The  
784 equation and regression line, including the 95% confidence interval (grey line shade),  
785 demonstrate the linear relationship between age in years and pupil size range in mm.

786

## 787 **Table captions**

788 **Table 1. *Participant characteristics.*** Sample properties for participants that were included  
789 (n=83), excluded after the trial (n=23) and excluded before the trial (n=7). Age, sex, visual  
790 aid status and Body Mass Index (BMI) were based on self-report. Iris colour and weather  
791 during the trial were rated by the experimenter. The season was derived from the date of  
792 testing. Numerical variables are given as “*mean (standard deviation)*”, categorical variables  
793 are given as “*count (%)*”, missing values (“0 (NA%)”) result from participants being  
794 excluded before those items were surveyed.

795

796 **Table 2. *Confirmatory hypothesis tests (n=83, log<sub>10</sub>-transformed).*** The tested models are  
797 given in Wilkinson-Rogers’ notation (column 2), with the key variables coloured in red. The  
798 Likelihood ratios between the tested models are given as Bayes factors in scientific notation  
799 (column 3), along with the proportional error in percent (pe %; column 4), while the  
800 interpretation of the likelihood ratios follows the standard categorisations [58]. Here, the  
801 sample from the adjusted data loss threshold (75%, n=83) and log<sub>10</sub>-transformed light data  
802 from the field condition were used. For the initial data threshold with reduced sample (50%,  
803 n=63) and non-transformed light data, see results display in Suppl. tables 8-10.  
804 Abbreviations: CH = confirmatory hypothesis;  $E_{V, mel}^{D65}$  = melanopic Equivalent Daylight  
805 Illuminance;  $E_V$  = photopic illuminance; BF<sub>10</sub> = Bayes Factor comparing H1 with H0; % pe =  
806 proportional error in percent.

807

808 **Table 3. *Exploratory hypothesis tests (n=83, log<sub>10</sub>-transformed).*** The tested models are  
809 given in Wilkinson-Rogers’ notation (column 2), with the key variables coloured in red. The  
810 Likelihood ratios between the tested models are given as Bayes factors in scientific notation

811 (column 3), along with the proportional error in percent (pe %; column 4), while the  
812 interpretation of the likelihood ratios follows the standard categorisations [58]. Here, the  
813 sample from the adjusted data loss threshold (75%, n=83) and log<sub>10</sub>-transformed light data  
814 from the field condition were used. Abbreviations: EH = exploratory hypothesis;  
815  $E_{V,mel}^{D65}$  = melanopic Equivalent Daylight Illuminance; BF<sub>10</sub> = Bayes Factor comparing H1  
816 with H0; % pe = proportional error in percent.

817



818

819

## References

820

821 1 McDougal, D. H., Gamlin, P. D. 2015 Autonomic control of the eye. *Compr Physiol.* **5**,  
822 439-473. (10.1002/cphy.c140014)

823 2 Loewenfeld, I. E., Lowenstein, O. 1999 *The pupil : anatomy, physiology, and clinical*  
824 *applications*. Boston: Butterworth-Heinemann.

825 3 Barlow, H. B. 1972 Dark and Light Adaptation: Psychophysics. In *Visual Psychophysics.*  
826 *Handbook of Sensory Physiology, vol 7 / 4.* (ed. ^eds. D. Jameson, L. M. Hurvich), pp. 1-28.  
827 Berlin/Heidelberg: Springer.

828 4 Campbell, F. W., Gregory, A. H. 1960 Effect of size of pupil on visual acuity. *Nature.* **187**,  
829 1121-1123. (10.1038/1871121c0)

830 5 Westheimer, G. 1964 Pupil size and visual resolution. *Vision Research.* **4**, 39-45.  
831 (10.1016/0042-6989(64)90030-6)

832 6 Liang, J., Williams, D. R. 1997 Aberrations and retinal image quality of the normal human  
833 eye. *J Opt Soc Am A Opt Image Sci Vis.* **14**, 2873-2883. (10.1364/josaa.14.002873)

834 7 Schwiegerling, J. 2000 Theoretical Limits to Visual Performance. *Survey of*  
835 *Ophthalmology.* **45**, 139-146. (10.1016/s0039-6257(00)00145-4)

836 8 Wang, B., Ciuffreda, K. J. 2006 Depth-of-focus of the human eye: theory and clinical  
837 implications. *Surv Ophthalmol.* **51**, 75-85. (10.1016/j.survophthal.2005.11.003)

838 9 CIE. 2018 *CIE S 026/E:2018: CIE System for Metrology of Optical Radiation for ipRGC-*  
839 *influenced Responses To Light*. Vienna, Austria: CIE Central Bureau.

840 10 Dacey, D. M., Liao, H. W., Peterson, B. B., Robinson, F. R., Smith, V. C., Pokorny, J.,  
841 Yau, K. W., Gamlin, P. D. 2005 Melanopsin-expressing ganglion cells in primate retina  
842 signal colour and irradiance and project to the LGN. *Nature.* **433**, 749-754.  
843 (10.1038/nature03387)

844 11 Gooley, J. J., Ho Mien, I., St Hilaire, M. A., Yeo, S. C., Chua, E. C., van Reen, E.,  
845 Hanley, C. J., Hull, J. T., Czeisler, C. A., Lockley, S. W. 2012 Melanopsin and rod-cone  
846 photoreceptors play different roles in mediating pupillary light responses during exposure to  
847 continuous light in humans. *J Neurosci.* **32**, 14242-14253. (10.1523/JNEUROSCI.1321-  
848 12.2012)

849 12 Bouma, H. 1962 Size of the static pupil as a function of wavelength and luminosity of the  
850 light incident on the human eye. *Nature.* **193**, 690-691. (10.1038/193690a0)

851 13 Daneault, V., Vandewalle, G., Hebert, M., Teikari, P., Mure, L. S., Doyon, J., Gronfier,  
852 C., Cooper, H. M., Dumont, M., Carrier, J. 2012 Does pupil constriction under blue and  
853 green monochromatic light exposure change with age? *J Biol Rhythms.* **27**, 257-264.  
854 (10.1177/0748730412441172)

855 14 McDougal, D. H., Gamlin, P. D. 2010 The influence of intrinsically-photosensitive retinal  
856 ganglion cells on the spectral sensitivity and response dynamics of the human pupillary light  
857 reflex. *Vision Res.* **50**, 72-87. (10.1016/j.visres.2009.10.012)

858 15 Spitschan, M. 2019 Photoreceptor inputs to pupil control. *J Vis.* **19**, 5. (10.1167/19.9.5)

859 16 Tsujimura, S., Ukai, K., Ohama, D., Nuruki, A., Yunokuchi, K. 2010 Contribution of  
860 human melanopsin retinal ganglion cells to steady-state pupil responses. *Proc Biol Sci.* **277**,  
861 2485-2492. (10.1098/rspb.2010.0330)

862 17 Barrionuevo, P. A., Nicandro, N., McAnany, J. J., Zele, A. J., Gamlin, P., Cao, D. 2014  
863 Assessing rod, cone, and melanopsin contributions to human pupil flicker responses. *Invest*  
864 *Ophthalmol Vis Sci.* **55**, 719-727. (10.1167/iovs.13-13252)

- 865 18 Spitschan, M., Jain, S., Brainard, D. H., Aguirre, G. K. 2014 Opponent melanopsin and S-  
866 cone signals in the human pupillary light response. *Proc Natl Acad Sci U S A.* **111**, 15568-  
867 15572. (10.1073/pnas.1400942111)
- 868 19 Kadlecova, V., Peleska, M., Vasko, A. 1958 Dependence on age of the diameter of the  
869 pupil in the dark. *Nature.* **182**, 1520-1521. (10.1038/1821520a0)
- 870 20 Seitz, R. 1957 [Dilation of the pupil in dark adaptation dependent on age]. *Klin Monbl*  
871 *Augenheilkd Augenarztl Fortbild.* **131**, 48-56.
- 872 21 Loewenfeld, I. E. 1979 Pupillary changes related to age. In *Topics in Neuro-*  
873 *Ophthalmology.* (ed. eds. H. S. Thompson, R. Daroff, L. Frisen, J. S. Glaser, M. D. Sander),  
874 pp. Baltimore: Williams & Wilkins.
- 875 22 Birren, J. E., Casperson, R. C., Botwinick, J. 1950 Age changes in pupil size. *J Gerontol.*  
876 **5**, 216-221. (10.1093/geronj/5.3.216)
- 877 23 Bitsios, P., Prettyman, R., Szabadi, E. 1996 Changes in autonomic function with age: a  
878 study of pupillary kinetics in healthy young and old people. *Age Ageing.* **25**, 432-438.  
879 (10.1093/ageing/25.6.432)
- 880 24 Guillon, M., Dumbleton, K., Theodoratos, P., Gobbe, M., Wooley, C. B., Moody, K. 2016  
881 The Effects of Age, Refractive Status, and Luminance on Pupil Size. *Optom Vis Sci.* **93**,  
882 1093-1100. (10.1097/OPX.0000000000000893)
- 883 25 Koch, D. D., Samuelson, S. W., Haft, E. A., Merin, L. M. 1991 Pupillary size and  
884 responsiveness. Implications for selection of a bifocal intraocular lens. *Ophthalmology.* **98**,  
885 1030-1035.
- 886 26 Korczyn, A. D., Laor, N., Nemet, P. 1976 Sympathetic pupillary tone in old age. *Arch*  
887 *Ophthalmol.* **94**, 1905-1906. (10.1001/archophth.1976.03910040615006)
- 888 27 Lobato-Rincon, L. L., Cabanillas-Campos Mdel, C., Bonnin-Arias, C., Chamorro-  
889 Gutierrez, E., Murciano-Cespedosa, A., Sanchez-Ramos Roda, C. 2014 Pupillary behavior in  
890 relation to wavelength and age. *Front Hum Neurosci.* **8**, 221. (10.3389/fnhum.2014.00221)
- 891 28 Winn, B., Whitaker, D., Elliott, D. B., Phillips, N. J. 1994 Factors affecting light-adapted  
892 pupil size in normal human subjects. *Invest Ophthalmol Vis Sci.* **35**, 1132-1137.
- 893 29 Mathur, A., Gehrman, J., Atchison, D. A. 2014 Influences of luminance and  
894 accommodation stimuli on pupil size and pupil center location. *Invest Ophthalmol Vis Sci.*  
895 **55**, 2166-2172. (10.1167/iovs.13-13492)
- 896 30 Wyatt, H. J. 1995 The form of the human pupil. *Vision Research.* **35**, 2021-2036.  
897 (10.1016/0042-6989(94)00268-q)
- 898 31 Meller, J. 1904 Über hyaline Degeneration des Pupillarrandes. *Albrecht von Graefe's*  
899 *Archiv für Ophthalmologie.* **59**, 221-228. (10.1007/bf01995294)
- 900 32 Panda-Jonas, S., Jonas, J. B., Jakobczyk-Zmija, M. 1995 Retinal photoreceptor density  
901 decreases with age. *Ophthalmology.* **102**, 1853-1859. (10.1016/s0161-6420(95)30784-1)
- 902 33 Jackson, G. R., Owsley, C., McGwin, G. 1999 Aging and dark adaptation. *Vision*  
903 *Research.* **39**, 3975-3982. (10.1016/s0042-6989(99)00092-9)
- 904 34 Pokorny, J., Smith, V. C., Lutze, M. 1987 Aging of the human lens. *Appl Opt.* **26**, 1437-  
905 1440. (10.1364/AO.26.001437)
- 906 35 Watson, A. B., Yellott, J. I. 2012 A unified formula for light-adapted pupil size. *J Vis.* **12**,  
907 12. (10.1167/12.10.12)
- 908 36 Barten, P. G. J. 1999 *Contrast sensitivity of the human eye and its effects on image*  
909 *quality.* Bellingham, WA: SPIE Optical Engineering Press.
- 910 37 Blackie, C. 1999 An extension of an accommodation and convergence model of  
911 emmetropization to include the effects of illumination intensity. *Ophthalmic and*  
912 *Physiological Optics.* **19**, 112-125. (10.1016/s0275-5408(98)00077-5)

- 913 38 Crawford, B. H. 1936 The dependence of pupil size upon external light stimulus under  
914 static and variable conditions. *Proceedings of the Royal Society of London. Series B -*  
915 *Biological Sciences*. **121**, 376-395. (10.1098/rspb.1936.0072)
- 916 39 de Groot, S. G., Gebhard, J. W. 1952 Pupil Size as Determined by Adapting Luminance\*.  
917 *Journal of the Optical Society of America*. **42**, (10.1364/josa.42.000492)
- 918 40 Holladay, L. L. 1926 The Fundamentals of Glare and Visibility. *Journal of the Optical*  
919 *Society of America*. **12**, (10.1364/josa.12.000271)
- 920 41 Moon, P., Spencer, D. E. 1944 On the Stiles-Crawford Effect. *Journal of the Optical*  
921 *Society of America*. **34**, (10.1364/josa.34.000319)
- 922 42 Stanley, P. 1995 The effect of field of view size on steady-state pupil diameter.  
923 *Ophthalmic and Physiological Optics*. **15**, 601-603. (10.1016/0275-5408(94)00019-v)
- 924 43 Berman, S. M., Fein, G., Jewett, D. L., Saika, G., Ashford, F. 1992 Spectral Determinants  
925 of Steady-State Pupil Size with Full Field of View. *Journal of the Illuminating Engineering*  
926 *Society*. **21**, 3-13. (10.1080/00994480.1992.10747995)
- 927 44 Geisler, W. S., Ringach, D. 2009 Natural systems analysis. Introduction. *Vis Neurosci*. **26**,  
928 1-3.
- 929 45 Felsen, G., Dan, Y. 2005 A natural approach to studying vision. *Nat Neurosci*. **8**, 1643-  
930 1646. (10.1038/nn1608)
- 931 46 Simoncelli, E. P., Olshausen, B. A. 2001 Natural image statistics and neural  
932 representation. *Annu Rev Neurosci*. **24**, 1193-1216. (10.1146/annurev.neuro.24.1.1193)
- 933 47 Harley, S. K., Sliney, D. H. 2018 Pupil Size in Outdoor Environments. *Health Phys*. **115**,  
934 354-359. (10.1097/HP.0000000000000887)
- 935 48 Webler, F. S., Spitschan, M., Foster, R. G., Andersen, M., Peirson, S. N. 2019 What is the  
936 'spectral diet' of humans? *Curr Opin Behav Sci*. **30**, 80-86. (10.1016/j.cobeha.2019.06.006)
- 937 49 Linden, M., Maier, W., Achberger, M., Herr, R., Helmchen, H., Benkert, O. 1996  
938 [Psychiatric diseases and their treatment in general practice in Germany. Results of a World  
939 Health Organization (WHO) study]. *Nervenarzt*. **67**, 205-215.
- 940 50 Deaver, D. M., Davis, J., Sliney, D. H. 1995 Vertical visual fields-of-view in outdoor  
941 daylight. *Lasers and Light in Ophthalmology*. **7**, 121-125.
- 942 51 Świrski, L., Dodgson, N. A. Year A fully-automatic, temporal approach to single camera,  
943 glint-free 3D eye model fitting [Abstract]. Proceedings of ECEM 2013; 2013; Lund,  
944 Sweden; 2013.
- 945 52 Lucas, R. J., Peirson, S. N., Berson, D. M., Brown, T. M., Cooper, H. M., Czeisler, C. A.,  
946 Figueiro, M. G., Gamlin, P. D., Lockley, S. W., O'Hagan, J. B., *et al.* 2014 Measuring and  
947 using light in the melanopsin age. *Trends Neurosci*. **37**, 1-9. (10.1016/j.tins.2013.10.004)
- 948 53 Muinos Diaz, Y., Saornil, M. A., Almaraz, A., Munoz-Moreno, M. F., Garcia, C., Sanz, R.  
949 2009 Iris color: validation of a new classification and distribution in a Spanish population-  
950 based sample. *Eur J Ophthalmol*. **19**, 686-689. (10.1177/112067210901900427)
- 951 54 Akerstedt, T., Gillberg, M. 1990 Subjective and objective sleepiness in the active  
952 individual. *Int J Neurosci*. **52**, 29-37. (10.3109/00207459008994241)
- 953 55 Snel, J., Lorist, M. M. 2011 Effects of caffeine on sleep and cognition. *Progress in brain*  
954 *research*. **190**, 105-117.
- 955 56 Ghotbi, N., Pilz, L. K., Winnebeck, E. C., Vetter, C., Zerbini, G., Lenssen, D., Frighetto,  
956 G., Salamanca, M., Costa, R., Montagnese, S., Roenneberg, T. 2020 The microMCTQ: An  
957 Ultra-Short Version of the Munich ChronoType Questionnaire. *J Biol Rhythms*. **35**, 98-110.  
958 (10.1177/0748730419886986)
- 959 57 Morey, R. D., Rouder, J. R. BayesFactor: Computation of Bayes Factors for Common  
960 Designs (R package version 0.9.12-4.2). 2018.
- 961 58 Jeffreys, H. 1961 *The theory of probability*. Oxford: Oxford University Press.

- 962 59 Wilkinson, G. N., Rogers, C. E. 1973 Symbolic Description of Factorial Models for  
963 Analysis of Variance. *Applied Statistics*. **22**, (10.2307/2346786)
- 964 60 Wilhelm, B., Wilhelm, H., Ludtke, H., Streicher, P., Adler, M. 1998 Pupillographic  
965 assessment of sleepiness in sleep-deprived healthy subjects. *Sleep*. **21**, 258-265.
- 966 61 Binda, P., Pereverzeva, M., Murray, S. O. 2013 Attention to bright surfaces enhances the  
967 pupillary light reflex. *J Neurosci*. **33**, 2199-2204. (10.1523/JNEUROSCI.3440-12.2013)
- 968 62 Hoeks, B., Levelt, W. J. M. 1993 Pupillary dilation as a measure of attention: a  
969 quantitative system analysis. *Behavior Research Methods, Instruments, & Computers*. **25**, 16-  
970 26. (10.3758/bf03204445)
- 971 63 Heaven, B., Hutton, S. B. 2011 Keeping an eye on the truth? Pupil size changes associated  
972 with recognition memory. *Memory*. **19**, 398-405. (10.1080/09658211.2011.575788)
- 973 64 Binda, P., Pereverzeva, M., Murray, S. O. 2013 Pupil constrictions to photographs of the  
974 sun. *J Vis*. **13**, (10.1167/13.6.8)
- 975 65 Privitera, C. M., Renninger, L. W., Carney, T., Klein, S., Aguilar, M. 2010 Pupil dilation  
976 during visual target detection. *J Vis*. **10**, 3. (10.1167/10.10.3)
- 977 66 Alnaes, D., Sneve, M. H., Espeseth, T., Endestad, T., van de Pavert, S. H., Laeng, B. 2014  
978 Pupil size signals mental effort deployed during multiple object tracking and predicts brain  
979 activity in the dorsal attention network and the locus coeruleus. *J Vis*. **14**, (10.1167/14.4.1)
- 980 67 Bradley, M. M., Miccoli, L., Escrig, M. A., Lang, P. J. 2008 The pupil as a measure of  
981 emotional arousal and autonomic activation. *Psychophysiology*. **45**, 602-607.  
982 (10.1111/j.1469-8986.2008.00654.x)
- 983 68 Abokyi, S., Owusu-Mensah, J., Osei, K. A. 2017 Caffeine intake is associated with pupil  
984 dilation and enhanced accommodation. *Eye (Lond)*. **31**, 615-619. (10.1038/eye.2016.288)
- 985 69 Team, R. C. R: A Language and Environment for Statistical Computing. Vienna, Austria:  
986 R Foundation for Statistical Computing 2023.
- 987 70 Morey, R. D., Rouder, J. N. BayesFactor: Computation of Bayes Factors for Common  
988 Designs. 2023.
- 989 71 Wickham, H. ggplot2: Elegant Graphics for Data Analysis. 3.3.2 ed. New York, NY:  
990 Springer 2016.
- 991 72 Rushton, W. A. H. 1965 The Ferrier Lecture, 1962: Visual Adaptation. *Proceedings of the*  
992 *Royal Society of London. Series B, Biological Sciences*. **162**, 20-46.
- 993 73 Cronin, T. W., Johnsen, S., Marshall, N. J., Warrant, E. J. 2014 *Visual ecology*. Princeton  
994 University Press.
- 995 74 Spitschan, M., Aguirre, G. K., Brainard, D. H., Sweeney, A. M. 2016 Variation of outdoor  
996 illumination as a function of solar elevation and light pollution. *Scientific Reports*. **6**, 26756.  
997 (10.1038/srep26756)
- 998 75 Do, M. T. H. 2019 Melanopsin and the Intrinsically Photosensitive Retinal Ganglion  
999 Cells: Biophysics to Behavior. *Neuron*. **104**, 205-226. (10.1016/j.neuron.2019.07.016)
- 1000 76 Liu, A., Milner, E. S., Peng, Y.-R., Blume, H. A., Brown, M. C., Bryman, G. S., Emanuel,  
1001 A. J., Morquette, P., Viet, N.-M., Sanes, J. R., *et al.* 2023 Encoding of environmental  
1002 illumination by primate melanopsin neurons. *Science*. **379**, 376-381.  
1003 (10.1126/science.ade2024)
- 1004 77 Heine, C., Yazdani, F., Wilhelm, H. 2013 Pupillenweite in Alltagssituationen. *Klinische*  
1005 *Monatsblätter für Augenheilkunde*. **230**, 1114-1118. (10.1055/s-0033-1350927)
- 1006 78 Giménez, M. C., Beersma, D. G. M., Bollen, P., van der Linden, M. L., Gordijn, M. C. M.  
1007 2014 Effects of a chronic reduction of short-wavelength light input on melatonin and sleep  
1008 patterns in humans: evidence for adaptation. *Chronobiology International*. **31**, 690-697.  
1009 (10.3109/07420528.2014.893242)



1010 79 Najjar, R. P., Chiquet, C., Teikari, P., Cornut, P.-L., Claustrat, B., Denis, P., Cooper, H.  
1011 M., Gronfier, C. 2014 Aging of non-visual spectral sensitivity to light in humans:  
1012 compensatory mechanisms? *PloS one*. **9**, e85837. (10.1371/journal.pone.0085837)  
1013  
1014  
1015

---

<sup>1</sup> Due to difficulties in filling the older age groups during the COVID pandemic, we later opened recruitment to more than 16 per age group to achieve a large enough total sample. In total, n=113 people were invited to the health and eligibility screening of whom n=106 were assigned to participate in the experimental protocol (see Suppl. Figure 1).

<sup>2</sup>No participants with IOLs were recruited in this study.

<sup>3</sup> After Stage 1 IPA: we decided to adopt the more widely established melanopsin sensitivity-weighted light intensity unit melanopic Equivalent Daylight Illuminance (melanopic EDI or mEDI) instead of melanopic irradiance. This does not affect any of our test results, as the two measures are simply a linear transformation of one another (mEDI = melanopic irradiance \* 1.32621318911359).

<sup>4</sup> After Stage 1 IPA: Our dataset revealed a higher proportion of pupil data exclusion than expected from the pilot runs. Thus, we decided to additionally use an adjusted threshold of 'acceptable' data loss proportion per participant to address high participant attrition. The second data loss threshold was determined in a data-driven approach (see *Results* under *Data quality checks, Proportion of excluded data*), resulting in a 75% threshold. For completeness and transparency, we report the results of our hypothesis tests in the reduced sample (n=63, 14354 valid observations, 50% threshold) and full sample (n=83, 17199 valid observations, 75% threshold).

<sup>5</sup> Correction: An unrelated and wrongfully cited study by Yung et al. (1990) in Stage 1 was replaced with the correct reference to Snel & Lorist (2011) in Stage 2.

<sup>6</sup> Iris colour, biological sex, and caffeine consumption per body weight were included in the exploratory post-hoc analysis.

<sup>7</sup> We followed the standard categorisation of Bayes factor strength of evidence according to Jeffreys (1961) [58] but omitted to note the interpretation for  $BF_{10} > 100$  ("decisive evidence").

<sup>8-12</sup> During analysis (after Stage 1 IPA and data collection), we realised a peculiarity in our originally formulated linear mixed model analyses. When predicting pupil size with linear light intensity data (mEDI/melanopic irradiance and photopic illuminance), these variables violate the assumptions of linear regression models, specifically the assumptions for linearity, homogeneity of variance and collinearity (see Suppl. Fig. 5 B, C and E). However, when  $\log_{10}$ -transforming the light data before including them in the linear models, the assumptions approximately met (cf. Suppl. Fig. 6). Following these results, we  $\log_{10}$ -transformed our light data (more details see *Linear Regression Assumptions* under *Results*) For completeness and transparency, we report the results of our hypothesis tests with the  $\log_{10}$ -transformed and linear, non-transformed data. The two alternative methods produce qualitatively similar results, though BayesFactors are larger when employing the  $\log_{10}$ -transformation.

<sup>13</sup> See footnote 4

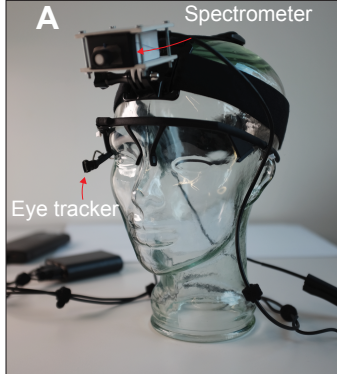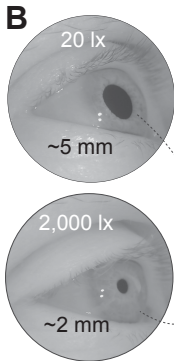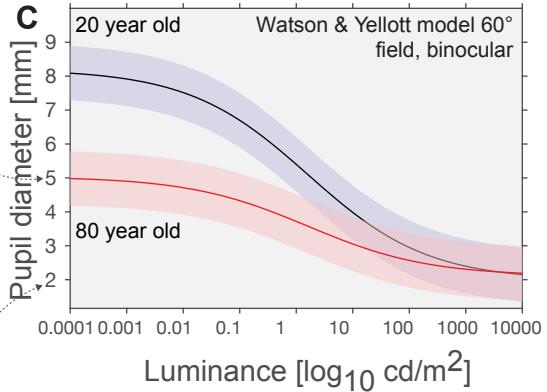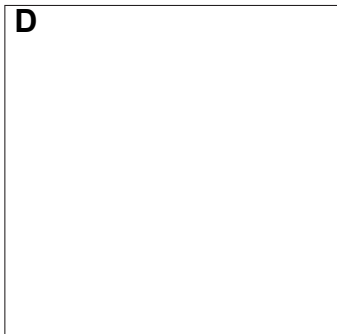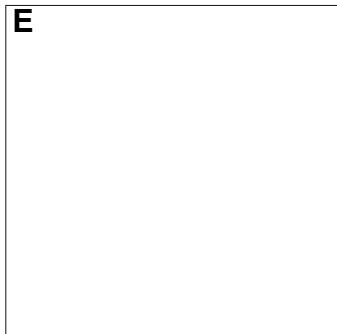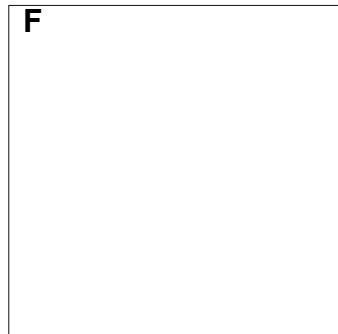



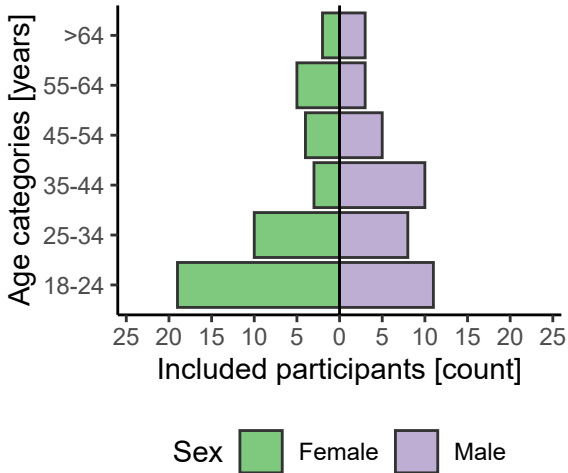

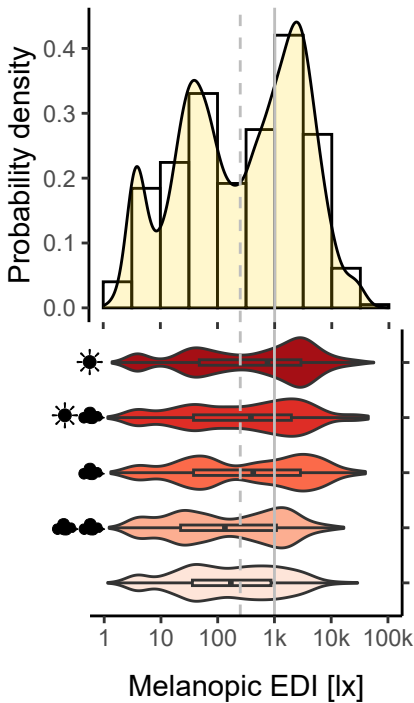

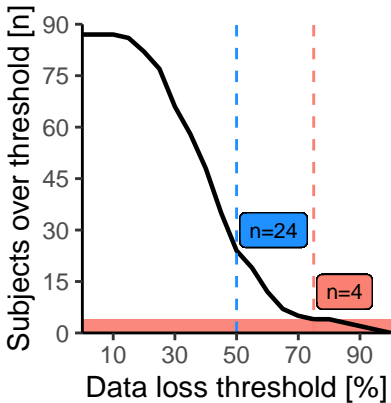

**A**

Laboratory conditions

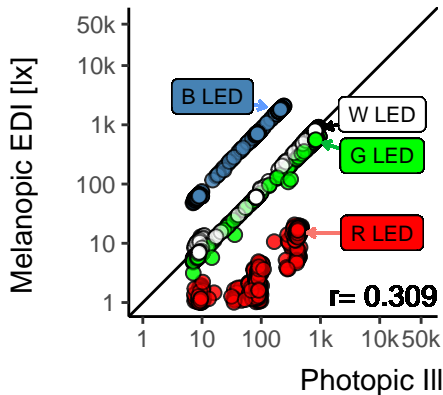**B**

Field conditions

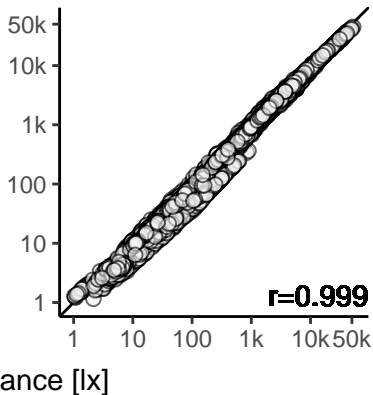

18-year-old participant

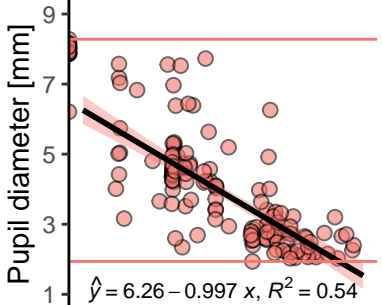

87-year-old participant

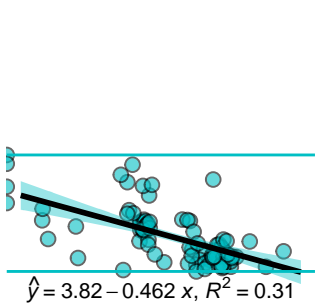

Melanopic EDI [lx]

Median pupil diameter [mm]

**A**  
10-min dark adaptation

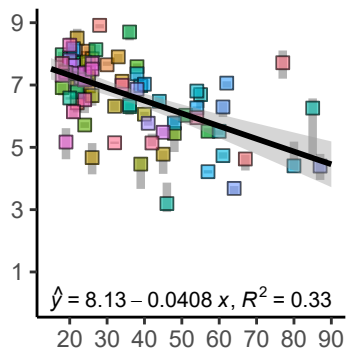

**B**  
Field: >1 & ≤10 lux

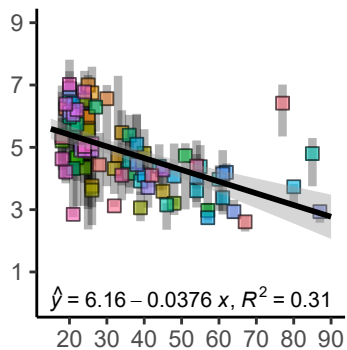

**C**  
Field: >10 & ≤100 lx

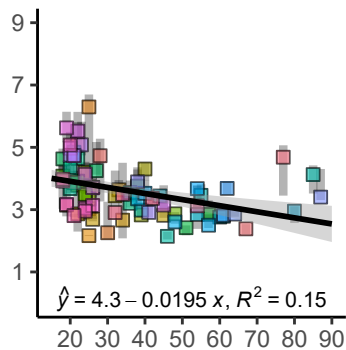

**D**  
Field: >100 & ≤1000 lx

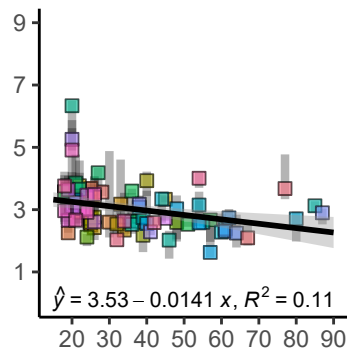

**E**  
Field: >1000 lux

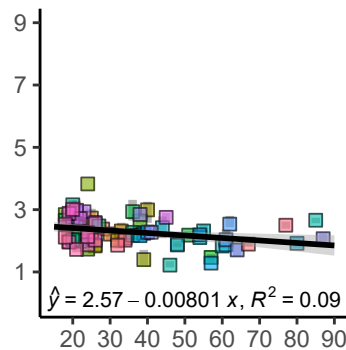

Age [years]



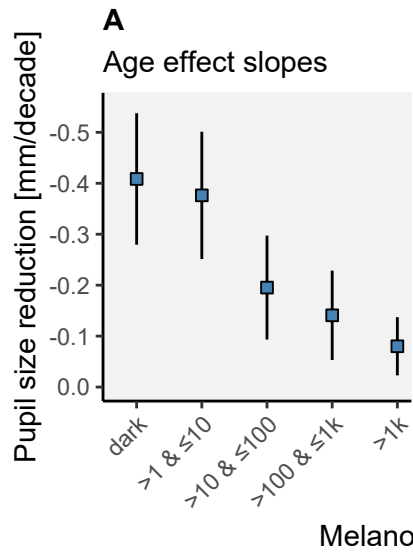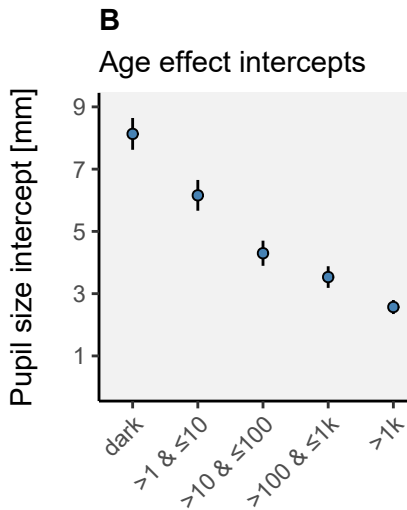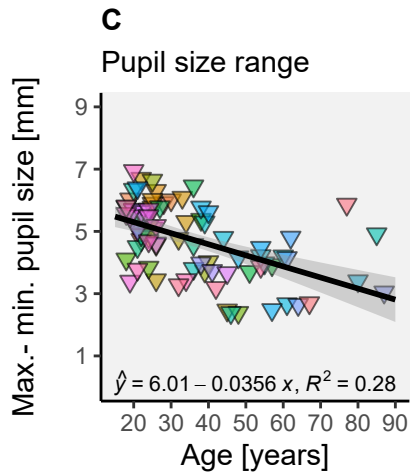

Source: https://www.biorxiv.org/content/10.1101/2023.10.16.562484v1.full.pdf
